# Supplementary material for: Next-Generation Sequencing of an 88-Year-Old Specimen of the Poorly Known Species Liagora japonica (Nemaliales, Rhodophyta) Supports the Recognition of Otohimella gen. nov
Source: PLoS One. 2016 Jul 7;11(7):e0158944. doi: 10.1371/journal.pone.0158944 (PMC4936710; doi:10.1371/journal.pone.0158944)
Supplement: S1 Text — (DOCX) [file pone.0158944.s003.docx]

**S1 Text. The DNA extraction and sequencing procedures for modern specimens.**

The modern specimens used in molecular analyses are listed in S1 Table. Total DNA was extracted from field-collected specimens dried by silica gel using the DNeasy Plant Mini Kit (QIAGEN, Tokyo, Japan) following the instructions of the manufacturer. The total DNA was used as a template for polymerase chain reaction (PCR) amplification using a TOYOBO KOD FX Neo (TOYOBO CO. LTD., Oosaka, Japan). Primers used for PCR amplification were: 28S *r*RNA gene: T01 (5’-TAAGCATATCAGTAAGCGGAG-3’) – V (5’-CGTATCGCCAGTTCTGCTTACC-3’), F449 (5’-CCCGAAGATGGTGAACTATG-3’) – G (5’-CACCACGTCCTCCTACTC-3’), T04 (5’-GCAGGACGGTGGCCATGGAAGT-3’) - 28F (5’-CAGAGCACTGGGCAGAAAATCAC-3’), and T05 (5’-GCAACGGKCAAAGGGAATCCG-3’) - T15 (5’-TGATAGGAAGAGCCGACATCGA-3’) [1, 2]; 18S rRNA gene: SR1 (5’-CCTGGTTGATCCTGCCAG-3’) - SR9 (5’-AACTAAGAACGGCCATGCAC-3’), and SR4 (5’-AGCCGCGGTAATTCCAGCT-3’) - SR12 (5’-CCTTCYGCAGGTTCACCTAC-3’) [3]; *rbc*L: F8 (5’-GGYGTAATTCCATATGCWAAAATG-3’) - R1150 (5’-GCATTTGWCCACARTGAATACC-3’) and F645 (5’-ATGMGHTGGAAAGAAAGATT-3’) - R1381 (5’- ATCTTTCCATAAATCTARAGC-3’) [4]; COI: GazF1 (5’-TCAACAAATCATAAAGATATTGG-3’) - GazR1 (5’-ACTTCTGGATGTCCAAAAAAYCA-3’) [5]. The temperature-cycling protocol was: 28S *r*RNA gene: 2 min at 94°C for an initial denaturation step, followed by 35 cycles of 15 sec denaturation at 94°C, 30 sec primer annealing at 55°C, and 1 min extension at 68°C, with a final 7 min extension at 72°C, and then a hold at 4°C; *rbc*L and COI: 2 min at 94°C for an initial denaturation step, followed by 35 cycles of 15 sec denaturation at 94°C, 30 sec primer annealing at 46°C and 1 min extension at 68°C, with a final 7 min extension at 72°C, and then a hold at 4°C. The amplified DNA fragments were purified using QIAquick PCR Purification Kit (QIAGEN, Tokyo, Japan). Cycle-sequencing with BigDye Terminator v3.1 Cycle Sequencing Kit (Applied Biosystems, Tokyo, Japan) was carried out in a 7.5 μl volume of reaction: 2 μl of BigDye Terminator v3.1 Reaction Mix, 10-30 ng/ml of PCR product, 10 pmol of primer, and dH2O to 7.5 μl. The cycle-sequencing program consisted of an initial step at 97°C for 2 min, 25 sequencing cycles (97°C for 10 s, 50°C for 25 s, 60°C for 2 min). The BigDye-labeled PCR products were ethanol-precipitated following the manufacturer's protocol and completely sequenced using ABI PRISM 310 Genetic Analyzer (Applied Biosystems, Tokyo, Japan). Reverse and direct chromatograms were assembled using the program GeneStudioTM Professional Ver. 2.2. (GeneStudio, Inc.).

**Additional References**

1. Freshwater DW, Fredericq S, Bailey JC. Characteristics and utility of nuclear-encoded large-subunit ribosomal gene sequences in phylogenetic studies of red algae. Phycol Res 1999; 47: 33–38.

2. Harper JT, Saunders GW. The application of sequences of the ribosomal cistron to the systematics and classification of the florideophyte red algae (Florideophyceae, Rhodophyta). Cah Biol Mar 2001; 42: 25–38.

3. Nakayama T, Watanabe S, Mitsui K, Uchida H, Inouye I. The phylogenetic relationship between the Chlamydomonadales and Chlorococcales inferred from 18SrDNA sequence data. Phycol Res 1996; 44: 47-55.

4. Wang HW, Kawaguchi S, Horiguchi T, Masuda M. Reinstatement of *Grateloupia catenata* (Rhodophyta, Halymeniaceae) on the basis of morphology and *rbc*L sequences. Phycologia 2000; 39: 228–237.

5. Saunders GW. Applying DNA barcoding to red macroalgae: a preliminary appraisal holds promise for future applications. Phil Trans R Soc B 2005; 360: 1879-1888.
